# Supplementary material for: The position of the target site for engineered nucleases improves the aberrant mRNA clearance in in vivo genome editing
Source: PubMed Central journal article supplement (PMC7060192; doi:10.1038/s41598-020-61154-4), 2020-03-06
Supplement: 41598_2020_61154_MOESM1_ESM.pdf [file 41598_2020_61154_MOESM1_ESM.pdf]

## The position of the target site for engineered nucleases improves the aberrant mRNA clearance in *in vivo* genome editing

Jae Hoon Lee<sup>1,¶</sup>, Sungsook Yu<sup>2,¶</sup>, Tae Wook Nam<sup>1,¶</sup>, Jae-il Roh<sup>1</sup>, Young Jin<sup>1</sup>, Jeong Pil Han<sup>3</sup>, Ji-Young Cha<sup>4</sup>, Yoon Ki Kim<sup>5</sup>, Su-Cheong Yeom<sup>3</sup>, Ki Taek Nam<sup>2, \*</sup>,  
and Han-Woong Lee<sup>1,\*</sup>

<sup>¶</sup>These authors contributed equally to this work.

\*Corresponding authors.

<sup>1</sup>Department of Biochemistry, College of Life Science and Biotechnology, Yonsei University, Seoul 03722, Republic of Korea

<sup>2</sup>Severance Biomedical Science Institute, Brain Korea 21 PLUS Project for Medical Science, Yonsei University College of Medicine, Seoul 03722, Republic of Korea

<sup>3</sup>Graduate School of International Agricultural Technology, Seoul National University, Pyeongchang 25354, Republic of Korea

<sup>4</sup>Department of Biochemistry, Lee Gil Ya Cancer and Diabetes Institute, GAIHST, Gachon University College of Medicine, Incheon 21999, Republic of Korea

<sup>5</sup>Division of Life Sciences, Korea University, Seoul 02841, Republic of Korea

Supplementary Table 1. Target sequences of engineered nucleases for each target gene

| Genes                      | Type of nucleases | Sequences with deletion mutation at the gene of interest | Direction |
|----------------------------|-------------------|----------------------------------------------------------|-----------|
| <i>p16<sup>Ink4a</sup></i> | TALEN             | TGCATGACGTGCGGGCACTGNNNNNNNNNNNGTTTCGCCCAACGCCCCGAA      | +         |
| <i>p19<sup>Arf</sup></i>   | TALEN             | TTCGTGCGATCCCGGAGACCNNNNNNNNNNNCTGCGCTCTGGCTTTCGTGA      | +         |
| <i>p53</i>                 | TALEN             | TATCAGCCTCGAGCTCCCTCNNNNNNNNNNNCATTTTCAGGCTTATGGAAA      | +         |
| <i>Cd47</i>                | CRISPR            | GGAGATGTGGCCCTTGGCGGCGG                                  | +         |
| <i>Ciita</i>               | CRISPR            | ACTGGATGAAGAGACCCGGGAGG                                  | +         |
| <i>Creb3</i>               | CRISPR            | GGCTTCCTGCTAGAGGAAAGCGG                                  | +         |
| <i>Il2ry</i>               | CRISPR            | AGGAGCACTGAGGTGTTTCAGGGG                                 | -         |
| <i>Lepr</i>                | CRISPR            | AGAAGCCCCCTTCAAAGCCGAGG                                  | -         |
| <i>Lxra</i>                | CRISPR            | GCACGCTATGTCTGCCACAGCGG                                  | +         |
| <i>Lxrb</i>                | CRISPR            | AGTGTCCAGAGAACTTGTGGGGG                                  | -         |
| <i>p27<sup>Kip1</sup></i>  | CRISPR            | GCGGATGGACGCCAGACAAGCGG                                  | +         |
| <i>Reep5</i>               | CRISPR            | CCAGTGGCTGACGTACTGGGTGG                                  | +         |
| <i>Rtp4</i>                | CRISPR            | TGCAGGCTCCACTTGGCCCCGGG                                  | -         |

The target sequences of TALENs or gRNAs are indicated in blue, and PAM sequence (NGG) are represented in red.

Supplementary Table 2. Sequences of deletion regions observed in the frameshift mutant mice

| Genes                      | Strains | Sequences with deletion mutation at the gene of interest                                                                                                                                                                                                                                                                                                                                                                                     | Deletion site ( $\Delta$ ) |
|----------------------------|---------|----------------------------------------------------------------------------------------------------------------------------------------------------------------------------------------------------------------------------------------------------------------------------------------------------------------------------------------------------------------------------------------------------------------------------------------------|----------------------------|
| <i>p16<sup>Ink4a</sup></i> | FVB/N   | WT GCGGCGGCCAGGGCCGTG <b>TGCATGACGTGCGGGCACTG</b> CTGGAAGCCGGG <b>GTTTCGCCCAACGCCCGAA</b> CTCTTTCGGTCGT<br>A A A Q G R V H D V R A L L E A G V S P N A P N S F G R<br>Mu GCGGCGGCCAGGGCCGTG <b>TGCATGACGTGCGGGCACTG</b> ----- <b>CCCGAACTCTTTCGGTCGT</b><br>A A A Q G R V H D V R A L ----- <u>P</u> <u>R</u> <u>T</u> <u>L</u> <u>S</u> <u>V</u> <u>V</u>                                                                                   | 25                         |
| <i>p16<sup>Ink4a</sup></i> | B6J     | WT GCGGCGGCCAGGGCCGTG <b>TGCATGACGTGCGGGCACTG</b> CTGGAAGCCGGG <b>GTTTCGCCCAACGCCCGAA</b> CTCTTTCGGTCGT<br>A A A Q G R V H D V R A L L E A G V S P N A P N S F G R<br>Mu GCGGCGGCCAGGGCCGTG <b>TGCATGACGTGCGGGCACTG</b> CTG <b>-AAGCCGGG</b> GTTTCGCCCAACGCCCGAACTCTTTCGGTCGT<br>A A A Q G R V H D V R A L L - <u>K</u> <u>P</u> <u>G</u> <u>F</u> <u>R</u> <u>P</u> <u>T</u> <u>P</u> <u>R</u> <u>T</u> <u>L</u> <u>S</u> <u>V</u> <u>V</u> | 1                          |
| <i>p19<sup>Arf</sup></i>   | FVB/N   | WT GAGAGGGTTTTCTTGGTGAAG <b>TTCGTGCGATCCCGGAGACC</b> CAGGACAGCGAG <b>CTGCGCTCTGGCTTTCGTGA</b> ACATGTTGTTG<br>E R V F L V K F V R S R R P R T A S C A L A F V N M L L<br>Mu GAGAGGGTTTTCTTGGTGAAG <b>TTCGTGCGATCCCGGAGACC</b> CAGGAC <b>-GCGAGCTGCGCTCTGGCTTTCGTGA</b> ACATGTTGTTG<br>E R V F L V K F V R S R R P R T- <u>R</u> <u>A</u> <u>A</u> <u>L</u> <u>W</u> <u>L</u> <u>S</u> <u>*</u>                                                | 1                          |
| <i>p19<sup>Arf</sup></i>   | B6J     | WT GAGAGGGTTTTCTTGGTGAAG <b>TTCGTGCGATCCCGGAGACC</b> CAGGACAGCGAG <b>CTGCGCTCTGGCTTTCGTGA</b> ACATGTTGTTG<br>E R V F L V K F V R S R R P R T A S C A L A F V N M L L<br>Mu GAGAGGGTTTTCTTGGTGAAG <b>TTCGTGCGATCCCGGAGACC</b> CAGG <b>-----CGAGCTGCGCTCTGGCTTTCGTGA</b> ACATGTTGTTG<br>E R V F L V K F V R S R R P R ----- <u>R</u> <u>A</u> <u>A</u> <u>L</u> <u>W</u> <u>L</u> <u>S</u> <u>*</u>                                            | 4                          |
| <i>p53</i>                 | FVB/N   | WT ATGGAGGAGTCACAGTCGGAT <b>TATCAGCCTCGAGCTCCCTC</b> TGAGCCAGGAGAC <b>ATTTTCAGGCTTATGGAA</b> ACTACTTCTCCA<br>M E E S Q S D I S L E L P L S Q E T F S G L W K L L P P<br>Mu ATGGAGGAGTCACAGTCGGAT <b>TATCAGCCTCGAGCTCCCTC</b> TGAG <b>-----ACATTTTCAGGCTTATGGAA</b> ACTACTTCTCCA<br>M E E S Q S D I S L E L P L S----- <u>H</u> <u>F</u> <u>Q</u> <u>A</u> <u>Y</u> <u>G</u> <u>N</u> <u>Y</u> <u>F</u> <u>L</u> <u>Q</u>                     | 7                          |
| <i>p53</i>                 | B6J     | WT ATGGAGGAGTCACAGTCGGAT <b>TATCAGCCTCGAGCTCCCTC</b> TGAGCCAGGAGAC <b>ATTTTCAGGCTTATGGAA</b> ACTACTTCTCCA<br>M E E S Q S D I S L E L P L S Q E T F S G L W K L L P P<br>Mu ATGGAGGAGTCACAGTCGGAT <b>TATCAGCCTCGAGCTCCCTC</b> TGAG <b>-CAGGAGACATTTTCAGGCTTATGGAA</b> ACTACTTCTCCA<br>M E E S Q S D I S L E L P L S- <u>R</u> <u>R</u> <u>H</u> <u>F</u> <u>Q</u> <u>A</u> <u>Y</u> <u>G</u> <u>N</u> <u>Y</u> <u>F</u> <u>L</u> <u>Q</u>     | 1                          |

|              |            |                                                                                                                                                                                                                                                                                                                                                                                                                                                 |           |
|--------------|------------|-------------------------------------------------------------------------------------------------------------------------------------------------------------------------------------------------------------------------------------------------------------------------------------------------------------------------------------------------------------------------------------------------------------------------------------------------|-----------|
| <b>Cd47</b>  | <b>B6J</b> | <p>WT CGGCGACCCCCGGCGGCGCGGAGATGTGGCCCTTGGCGGGCGGCGCTGTTGCTGGGCTCCTGCTGCTGCGGTTTCAGCTCAACTA<br/> M W P L A A A L L L G S C C C G S A Q L</p> <p>Mu CGGCGACCCCCGGCGGCGCGGAGATGTG-----CTGGGCTCCTGCTGCTGCGGTTTCAGCTCAACTA<br/> M <u>C</u>----- <u>W</u> <u>A</u> <u>P</u> <u>A</u> <u>A</u> <u>V</u> <u>Q</u> <u>L</u> <u>N</u> <u>Y</u></p>                                                                                                       | <b>22</b> |
| <b>Ciita</b> | <b>B6J</b> | <p>WT AGCAAGCTGTTGCAGGACATGGA<u>ACTGGATGAAGAGACCCGGGAGG</u>CCTATGCCAACATTGCGGAACTGGATCAGTACGTGTTTC<br/> S K L L Q D M E L D E E T R E A Y A N I A E L D Q Y V F</p> <p>Mu AGCAAGCTGTTGCAGGACATGGA<u>ACTGGATGAAGAGAC</u>---GGGAGGCCTATGCCAACATTGCGGAACTGGATCAGTACGTGTTTC<br/> S K L L Q D M E L D E E T-- <u>G</u> <u>G</u> <u>L</u> <u>C</u> <u>Q</u> <u>H</u> <u>C</u> <u>G</u> <u>T</u> <u>G</u> <u>S</u> <u>V</u> <u>R</u> <u>V</u></p>      | <b>2</b>  |
| <b>Creb3</b> | <b>B6J</b> | <p>WT GAGGAAAGCGGAGATTTGTGGGCTGCGACTGAGCCGGACGTGAAGGCTCCGCTGGACTTAGAG//GACTGGGAGGTAGAGGAT<br/> E E S G D L W A A T E P D V K A P L D L E--/-D W E V E D</p> <p>Mu GAGGAA-GCGGAGATTTGTGGGCTGCGACTGAGCCGGACGTGAAGGCTCCGCTG-----//---TGGGAGGTAGAGGAT<br/> E E -<u>A</u> <u>E</u> <u>I</u> <u>C</u> <u>G</u> <u>L</u> <u>R</u> <u>L</u> <u>S</u> <u>R</u> <u>T</u> <u>*</u></p>                                                                     | <b>1</b>  |
| <b>Il2ry</b> | <b>B6J</b> | <p>WT GATTTGATCCTGACTTCTACAG<u>CCCCTGAACACCTCAGTGCTCCT</u>ACTCTGCCCCCTCCAGAGGTTTCAGTGCTTTGTGTTCAAC<br/> D L I L T S T A P E H L S A P T L P L P E V Q C F V F N</p> <p>Mu GATTTGATCCTGACTTCTACA-----CCTCAGTGCTCCTACTCTGCCCCCTCCAGAGGTTTCAGTGCTTTGTGTTCAAC<br/> D L I L T S T ----- <u>P</u> <u>Q</u> <u>C</u> <u>S</u> <u>Y</u> <u>S</u> <u>A</u> <u>P</u> <u>S</u> <u>R</u> <u>G</u> <u>S</u> <u>V</u> <u>L</u> <u>C</u> <u>V</u> <u>Q</u></p> | <b>11</b> |
| <b>Lepr</b>  | <b>B6J</b> | <p>WT CCTGCTGGAGCCCCAAACAATG<u>CCTCGGCTTTGAAGGGGGCTTCTGA</u>AAGCAATTGTTGAAGCTAAATTTAATTCAAGTGGTATC<br/> P A G A P N N A S A L K G A S E A I V E A K F N S S G I</p> <p>Mu CCTGCTGGAGCCCCAAACAATGC-----CTTTGAAGGGGGCTTCTGAAGCAATTGTTGAAGCTAAATTTAATTCAAGTGGTATC<br/> P A G A P N N A----- <u>F</u> <u>E</u> <u>G</u> <u>G</u> <u>F</u> <u>*</u></p>                                                                                              | <b>5</b>  |
| <b>Lxra</b>  | <b>B6J</b> | <p>WT TTCCGCCGAGTGTCATCAAGGGAG<u>GCAGCTATGTCTGCCACAGCGG</u>TGGCCACTGCCCCATGGACACCTACATGCGGATGGGG<br/> F R R S V I K G A R Y V C H S G G H C P M D T Y M R R K</p> <p>Mu TTCCGCCGAGTGTCATCAA-----TGGACACCTACATGCGGATGGGG<br/> F R R S V I <u>N</u>----- <u>G</u> <u>H</u> <u>L</u> <u>H</u> <u>A</u> <u>D</u> <u>G</u></p>                                                                                                                       | <b>41</b> |
| <b>Lxrb</b>  | <b>B6J</b> | <p>WT TTCGTGACCCACTATGTCTT<u>CCCCACAAGTTCTCTGGACACT</u>CCCGTGCTGGGAATGGTTCTCCTCAGCCCAGTACCTCCGC<br/> M S S P T S S L D T P V P G N G S P Q P S T S A</p> <p>Mu TTCGTGACCCACTATGTCTTCCCCA--AGTTCTCTGGACACTCCCGTGCTGGGAATGGTTCTCCTCAGCCCAGTACCTCCGC<br/> M S S P --<u>K</u> <u>F</u> <u>S</u> <u>G</u> <u>H</u> <u>S</u> <u>R</u> <u>A</u> <u>W</u> <u>E</u> <u>W</u> <u>F</u> <u>S</u> <u>S</u> <u>A</u> <u>Q</u> <u>Y</u> <u>L</u> <u>R</u></p> | <b>2</b>  |

|                                                                                                                                                                                                                                                                                                                                   |              |                                                                                                                                                                                                                                                                                                                            |           |
|-----------------------------------------------------------------------------------------------------------------------------------------------------------------------------------------------------------------------------------------------------------------------------------------------------------------------------------|--------------|----------------------------------------------------------------------------------------------------------------------------------------------------------------------------------------------------------------------------------------------------------------------------------------------------------------------------|-----------|
| <b><i>p27<sup>Kip1</sup></i></b>                                                                                                                                                                                                                                                                                                  | <b>FVB/N</b> | WT AACGGGAGCCCGAGCCTGGAG <b>GCGGATGGACGCCAGACAAGCG</b> GAGCACCCCAAGCCTTCCGCCTGCAGAAATCTCTCGGCCCG<br>N G S P S L E R M D A R Q A E H P K P S A C R N L F G P<br>Mu AACGGGAGCCCGAGCCTGGA-----CACCCCAAGCCTTCCGCCTGCAGAAATCTCTCGGCCCG<br>N G S P S L <u>D</u> ----- <u>T P S L P P A E I S S A R</u>                           | <b>25</b> |
| <b><i>Reep5</i></b>                                                                                                                                                                                                                                                                                                               | <b>B6J</b>   | WT AGTCCCAACAAAGATGATGACACCC <b>AGTGGCTGACGTACTGGGTGG</b> TATATGGTGTGTTTCAGCATTGCCGAATTCTTCTCCGAT<br>S P N K D D D T Q W L T Y W V V Y G V F S I A E F F S D<br>Mu AGTCCCAACAAAGATGATGACACCCAGTGGCTGACGT-----GGTATATGGTGTGTTTCAGCATTGCCGAATTCTTCTCCGAT<br>S P N K D D D T Q W L T ----- <u>W Y M V C S A L P N S S P I</u> | <b>7</b>  |
| <b><i>Rtp4</i></b>                                                                                                                                                                                                                                                                                                                | <b>B6J</b>   | WT GAGCAGACATTTCAAGAACTGATGCAGGAGGAGAAG <b>CCGGGGCCAAGTGGAGCCTGCA</b> TTTGGATAAGAACATTGTACCAGAT<br>E Q T F Q E L M Q E E K P G A K W S L H L D K N I V P D<br>Mu GAGCAG-----CCTGCATTTGGATAAGAACATTGTACCAGAT<br>E Q ----- <u>P A F G *</u>                                                                                  | <b>47</b> |
| <p>The target sequences of TALENs or gRNAs are indicated in blue, and PAM sequence (NGG) are represented in red in the wild-type nucleotide sequences. The deleted nucleotides and PTCs are denoted by a red dash (-) and asterisk (*), respectively. Mutant amino acid sequences are denoted by underlined fonts. Mu, Mutant</p> |              |                                                                                                                                                                                                                                                                                                                            |           |

Supplementary Table 3. Summary of the results of the engineered nucleases-mediated genome editing in mice

| Gene name                  | Strain | Type of nucleases | Distance from ATG to indel (bp)* | Indel size (bp) | Distance in mRNA (bp) |                 |                 | Exon             |          |          |           |
|----------------------------|--------|-------------------|----------------------------------|-----------------|-----------------------|-----------------|-----------------|------------------|----------|----------|-----------|
|                            |        |                   |                                  |                 | from indel to PTC     | from ATG to PTC | from PTC to EJC | with start codon | targeted | with PTC | last exon |
| <i>Cd47</i>                | B6J    | CRISPR            | 5                                | 22              | 58                    | 63              | 309             | 1                | 1        | 2        | 10        |
| <i>Lxrb</i>                | B6J    | CRISPR            | 13                               | 2               | 74                    | 87              | 65              | 3                | 3        | 4        | 10        |
| <i>Rtp4</i>                | B6J    | CRISPR            | 36                               | 47              | 15                    | 98              | 63              | 1                | 1        | 1        | 2         |
| <i>p53</i>                 | FVB/N  | TALEN             | 53                               | 7               | 439                   | 492             | 51              | 2                | 2        | 5        | 11        |
| <i>p53</i>                 | B6J    | TALEN             | 54                               | 1               | 444                   | 498             | 51              | 2                | 2        | 5        | 11        |
| <i>p27<sup>Kip1</sup></i>  | FVB/N  | CRISPR            | 58                               | 86              | 59                    | 117             | 272             | 1                | 1        | 1        | 3         |
| <i>p16<sup>Ink4a</sup></i> | FVB/N  | TALEN             | 69                               | 25              | 36                    | 105             | 334             | 1                | 1        | 2        | 3         |
| <i>p16<sup>Ink4a</sup></i> | B6J    | TALEN             | 72                               | 1               | 57                    | 129             | 334             | 1                | 1        | 2        | 3         |
| <i>Creb3</i>               | B6J    | CRISPR            | 75                               | 1               | 36                    | 112             | 44              | 1                | 1        | 2        | 9         |
| <i>p19<sup>arf</sup></i>   | B6J    | TALEN             | 89                               | 22              | 19                    | 108             | 60              | 1                | 1        | 1        | 3         |
| <i>p19<sup>arf</sup></i>   | FVB/N  | TALEN             | 104                              | 1               | 25                    | 129             | 60              | 1                | 1        | 1        | 3         |
| <i>Il2ry</i>               | B6J    | CRISPR            | 135                              | 11              | 81                    | 216             | 42              | 1                | 2        | 2        | 8         |
| <i>Lepr</i>                | B6J    | CRISPR            | 170                              | 5               | 19                    | 189             | 176             | 2                | 3        | 3        | 19        |
| <i>Reep5</i>               | B6J    | CRISPR            | 265                              | 7               | 77                    | 349             | 2               | 1                | 3        | 3        | 5         |

|                     |            |               |            |           |            |            |           |          |          |          |           |
|---------------------|------------|---------------|------------|-----------|------------|------------|-----------|----------|----------|----------|-----------|
| <b><i>Lxra</i></b>  | <b>B6J</b> | <b>CRISPR</b> | <b>376</b> | <b>41</b> | <b>251</b> | <b>627</b> | <b>34</b> | <b>2</b> | <b>4</b> | <b>5</b> | <b>10</b> |
| <b><i>Ciita</i></b> | <b>B6J</b> | <b>CRISPR</b> | <b>503</b> | <b>2</b>  | <b>115</b> | <b>618</b> | <b>47</b> | <b>1</b> | <b>3</b> | <b>5</b> | <b>19</b> |

\*Gene lists were sorted in order of the distance from ATG to indel (bp). Refer to the schematic diagram in Figure S3 to understand each parameter.

Supplementary Table 4. Publications for the genome editing in mice using engineered nucleases

| Gene name     | Type of nuclease | Targeting strategy | Distance in mRNA (bp) |            |                   | Exon     |        |          |           | Method to detect expression | Accession No. | Ref |
|---------------|------------------|--------------------|-----------------------|------------|-------------------|----------|--------|----------|-----------|-----------------------------|---------------|-----|
|               |                  |                    | from ATG to indel     | Indel size | from indel to PTC | with ATG | Target | with PTC | last exon |                             |               |     |
| <i>Sepw1</i>  | TALEN            | first coding exon  | 0                     | 2~266      | 0                 | 1        | 1      | 0        | 6         | WB                          | NM_009156     | 1   |
| <i>Hprt</i>   | Cas9             | first coding exon  | 3                     | 124        | 37                | 1        | 1      | 3        | 9         | NT                          | NM_013556     | 2   |
| <i>Pate1</i>  | Cas9             | first coding exon  | 3                     | +1         | 71                | 1        | 1      | 2        | 5         | NT                          | NM_001199953  | 3   |
| <i>Slx2</i>   | Cas9             | first coding exon  | 4                     | 8          | 15                | 2        | 2      | 2        | 9         | WB, ICC                     | NM_001200013  | 4   |
| <i>Cetn1</i>  | Cas9             | first coding exon  | 17                    | 8          | 38                | 1        | 1      | 1*       | 1         | NT                          | NM_007593     | 5   |
| <i>P11</i>    | Cas9             | first coding exon  | 21                    | 31         | 48                | 2        | 2      | 2        | 3         | RT, WB                      | NM_009112     | 6   |
| <i>Prm1</i>   | Cas9             | first coding exon  | 25                    | 5          | 114               | 1        | 1      | 1*       | 1         | NT                          | NM_013637     | 5   |
| <i>Wdr63</i>  | Cas9             | first coding exon  | 27                    | 73         | 34                | 2        | 2      | 3        | 23        | NT                          | NM_172864     | 7   |
| <i>Ttc36</i>  | TALEN            | first coding exon  | 27                    | 2          | 19                | 1        | 1      | 1        | 3         | WB, RT                      | NM_138951     | 8   |
| <i>Pate3</i>  | Cas9             | first coding exon  | 35                    | 1          | 26                | 1        | 1      | 2        | 3         | NT                          | NM_001167592  | 3   |
| <i>Dmrt1</i>  | Cas9             | first coding exon  | 35                    | +1         | 412               | 1        | 1      | 2        | 5         | NT                          | NM_015826     | 9   |
| <i>Fam83h</i> | Cas9             | first coding exon  | 39                    | 26         | 42                | 2        | 2      | 2        | 5         | RT, WB                      | NM_001168253  | 10  |
| <i>Fabp7</i>  | Cas9n            | first coding exon  | 42                    | 28         | 37                | 1        | 1      | 2        | 4         | WB                          | NM_021272     | 11  |
| <i>Mikl</i>   | TALEN            | first coding exon  | 54                    | 2          | 1                 | 2        | 2      | 2        | 11        | WB                          | NM_001310613  | 12  |
| <i>Psd2</i>   | Cas9             | first coding exon  | 65                    | 112        | 5                 | 1        | 1      | 1        | 4         | WB, IHC                     | NM_001289602  | 13  |
| <i>Mikl</i>   | Cas9             | first coding exon  | 101                   | 1          | 102               | 2        | 2      | 2        | 11        | NT                          | NM_001310613  | 14  |
| <i>Pibf1</i>  | TALEN            | first coding exon  | 110                   | 2~14       | 1                 | 2        | 2      | 2        | 18        | NT                          | NM_029320     | 1   |



|                 |       |                   |                |       |     |   |   |   |    |         |              |    |
|-----------------|-------|-------------------|----------------|-------|-----|---|---|---|----|---------|--------------|----|
| <i>Dmrt3</i>    | Cas9  | first coding exon | 121            | 8     | 333 | 1 | 1 | 1 | 2  | NT      | NM_177360    | 9  |
| <i>Fam83h</i>   | Cas9  | first coding exon | 133            | 26    | 42  | 2 | 2 | 2 | 5  | RT, WB  | XM_006520236 | 10 |
| <i>FATS</i>     | TALEN | first coding exon | 154            | 151   | 159 | 2 | 2 | 2 | 8  | WB      | NM_001081331 | 15 |
| <i>Tyr</i>      | Cas9  | first coding exon | 230            | 1~32  | 20  | 1 | 1 | 1 | 5  | NT      | NM_011661    | 16 |
| <i>Tet2</i>     | Cas9  | first coding exon | 3008           | 8     | 104 | 3 | 3 | 3 | 11 | NT      | NM_001040400 | 17 |
| <i>Ptch1</i>    | Cas9  | proximity to ATG  | 34             | 4~251 | 1   | 1 | 2 | 2 | 24 | NT      | NM_001328514 | 18 |
| <i>Ccdc63</i>   | Cas9  | proximity to ATG  | 50             | +1    | 154 | 2 | 3 | 4 | 12 | NT      | NM_001289809 | 7  |
| <i>Notch1</i>   | Cas9  | proximity to ATG  | 77             | 5     | 47  | 1 | 2 | 2 | 34 | IHC     | NM_008714    | 19 |
| <i>Jag1</i>     | ZFN   | proximity to ATG  | 84             | 2     | 19  | 1 | 2 | 2 | 26 | NT      | NM_013822    | 20 |
| <i>Ccdc63</i>   | Cas9  | proximity to ATG  | 112            | +1    | 154 | 3 | 4 | 5 | 13 | NT      | NM_183307    | 7  |
| <i>Pate2</i>    | Cas9  | proximity to ATG  | 153            | 4     | 79  | 1 | 3 | 4 | 4  | NT      | NM_001033421 | 3  |
| <i>Prss55</i>   | Cas9  | proximity to ATG  | 136            | 17    | 12  | 1 | 2 | 2 | 5  | NT      | NM_001081063 | 21 |
| <i>Nxt2</i>     | Cas9  | proximity to ATG  | 140            | 101   | 5   | 1 | 3 | 3 | 4  | NT      | NM_172782    | 21 |
| <i>Lyzl1</i>    | Cas9  | proximity to ATG  | 187            | 50    | 68  | 2 | 3 | 3 | 5  | NT      | NM_026092    | 21 |
| <i>Plcd1</i>    | Cas9  | proximity to ATG  | 180            | 2~45  | 66  | 1 | 2 | 2 | 15 | RT, IHC | NM_001293648 | 22 |
| <i>Notch3</i>   | ZFN   | proximity to ATG  | 208            | 1     | 270 | 1 | 3 | 4 | 34 | NT      | NM_008716    | 20 |
| <b>32 cases</b> |       |                   | <b>Ave: 76</b> |       |     |   |   |   |    |         |              |    |

RT, RT-PCR; WB, Western blotting; IHC, Immunohistochemistry; ICC, Immunocytochemistry; NT, Not tested; Ave, Average;

\*PTCs are present in the last exon.

**Supplementary Table 5. Tumor spectrum of homozygous p53 mutant mice**

| <b>Tissue</b> | <b>Diagnosis</b>                | <b>Incidence</b> |       |
|---------------|---------------------------------|------------------|-------|
| <b>Brain</b>  | Astrocytoma                     | 2                | 3/21  |
|               | Neoplastic Perivascular cuffing | 1                |       |
| <b>Liver</b>  | Hypertrophy                     | 1                | 13/21 |
|               | Inflammation                    | 2                |       |
|               | Leukemia                        | 2                |       |
|               | Lymphocytic leukemia            | 3                |       |
|               | Necrosis                        | 1                |       |
|               | Histiocytic sarcoma             | 3                |       |
|               | Malignant lymphoma              | 1                |       |
|               | Focal lymphocytic infiltration  | 1                |       |
| <b>kidney</b> | Interstitial Nephritis          | 2                | 6/21  |
|               | Lymphocytic leukemia            | 3                |       |
|               | Metaplasia                      | 1                |       |
| <b>spleen</b> | Lymphoma                        | 1                | 9/21  |
|               | Lymphocytic leukemia            | 2                |       |
|               | Histiocytic sarcoma             | 2                |       |
|               | Lympho sarcoma                  | 1                |       |
|               | Metaplasia                      | 1                |       |
|               | Hyperplasia                     | 1                |       |
|               | Malignant lymphoma              | 1                |       |

|                        |                      |   |      |
|------------------------|----------------------|---|------|
| <b>Pancreas</b>        | Necrosis             | 1 | 1/21 |
| <b>Heart</b>           | Leukemia             | 1 | 2/21 |
|                        | Lymphocytic leukemia | 1 |      |
| <b>Thymus</b>          | Thymoma Malignant    | 1 | 5/21 |
| <b>Lung</b>            | Hemangio sarcoma     | 1 | 9/21 |
|                        | Leukemia             | 1 |      |
|                        | Lymphocytic leukemia | 3 |      |
|                        | Metaplasia           | 1 |      |
|                        | Histiocytic sarcoma  | 2 |      |
|                        | Malignant lymphoma   | 1 |      |
| <b>Lymph node</b>      | Leukemia             | 1 | 4/21 |
|                        | Hemangio sarcoma     | 1 |      |
|                        | Lympho sarcoma       | 1 |      |
|                        | Histiocytic sarcoma  | 1 |      |
|                        | Lymphoma             | 1 |      |
| <b>Small intestine</b> | Leukemia             | 1 | 3/21 |
|                        | Lymphocytic leukemia | 1 |      |
|                        | Histiocytic sarcoma  | 1 |      |
| <b>Colon</b>           | Lymphocytic leukemia | 1 | 1/21 |
| <b>Ovary</b>           | Hemangio sarcoma     | 1 | 1/21 |
| <b>Bladder</b>         | Hypertrophy          | 1 | 3/21 |
|                        | Hyperplasia          | 1 |      |
|                        | Lymphocytic leukemia | 1 |      |
| <b>Utreus</b>          | Histiocytic sarcoma  | 1 | 1/21 |

|                 |                     |   |      |
|-----------------|---------------------|---|------|
| <b>Prostate</b> | Histiocytic sarcoma | 1 | 1/21 |
| <b>Tumor</b>    | Hemangio sarcoma    | 1 | 5/21 |
|                 | Fibro sarcoma       | 2 |      |
|                 | Histiocytic sarcoma | 1 |      |
|                 | Malignant thymoma   | 1 |      |

**Supplementary Table 6. List of primers used for PAGE- or PCR-based genotyping**

| Target gene                              | Forward primer                  | Reverse primer                | Size of PCR product |            |
|------------------------------------------|---------------------------------|-------------------------------|---------------------|------------|
|                                          |                                 |                               | WT                  | Mutant     |
| <b><i>Cd47</i></b>                       | GGTCGGTCGTTTCCCTTGAA            | GATCCCCGAGCCACTCAC            | <b>147</b>          | <b>125</b> |
| <b><i>Ciita</i></b>                      | GCTGGAGAAAAAGCACTGGC            | CATAGGCCTCCCGGGTCT (WT)       | <b>241</b>          | -          |
|                                          | ATGGAACTGGATGAAGAGACGG (Mutant) | CCCTCCCTTCTAGCCCTAGTT         | -                   | <b>157</b> |
| <b><i>Creb3</i></b>                      | GTTGTGTTGGAAGCTGAGGA            | CAGAGCAGTATGGGGGAT            | <b>788</b>          | <b>649</b> |
| <b><i>Il2rg</i></b>                      | CTCTCCCAGCTAACCTCCCT            | GACTTCTACAGCCCCCTGA (WT)      | <b>200</b>          | -          |
|                                          | GTCCTCATGTCCAGTGCGAA            | GGAGCACTGAGGTGTAG (Mutant)    | -                   | <b>259</b> |
| <b><i>Lepr</i></b>                       | CTGCTGGAGCCCCAAACAATGC          | TTCAACAATTGCTTCAGAAGCC        | <b>59</b>           | <b>54</b>  |
| <b><i>Lxra</i></b>                       | GGCTACATATTATGAATCAG            | GAAGTTTTAATCCCACTCA           | <b>514</b>          | <b>473</b> |
| <b><i>Lxrb</i></b>                       | AGCCTAGAGTAGTGTGTTCC            | GAGAGATAGCGACAAAGAGA          | <b>655</b>          | <b>653</b> |
| <b><i>p16<sup>link4a</sup> (FVB)</i></b> | GAGGAGAGCCATCTGGAG              | CCTTGCCTACCTGAATCG            | <b>158</b>          | <b>133</b> |
| <b><i>p16<sup>link4a</sup> (B6)</i></b>  | GTTTAATGGGTGGCTCCGGT            | CGTGCGGGCACTGCTGGAAGCCGG (WT) | <b>220</b>          | -          |
|                                          | GGTGTTAGCGTGGGTAGCAG            | TTGGGCGAAACCCAGC (Mutant)     | -                   | <b>455</b> |
| <b><i>p19<sup>Arf</sup> (FVB)</i></b>    | GCTTCTCACCTCGCTTGTC             | AGAGCGCAGCTCGCTG (WT)         | <b>177</b>          | -          |
|                                          | GCTTCTCACCTCGCTTGTC             | GAGCGCAGCTCGCG (Mutant)       | -                   | <b>176</b> |

|                                 |                              |                                   |            |            |
|---------------------------------|------------------------------|-----------------------------------|------------|------------|
| <b>p19<sup>Arf</sup> (B6)</b>   | TCCTCTCTAGCCTCAACAAC         | AGGGTTTTCTTGGTGAAGTTC             | <b>94</b>  | <b>90</b>  |
| <b>p27<sup>Kip1</sup> (FVB)</b> | GATGTCAAACGTGAGAGTGT         | CACTTGCCTGACTCGCT                 | <b>180</b> | <b>155</b> |
| <b>p53 (FVB)</b>                | ATTTCCCTACTGGATGTCCCACC      | TTTCCATAAGCCTGAAAATGTCTCCTGG (WT) | <b>212</b> | -          |
|                                 | GAGCTCCCTCTGAGACATT (Mutant) | TTCTCTCAGGCAAGGGGAGGATA           | -          | <b>107</b> |
| <b>p53 (B6)</b>                 | ATTTCCCTACTGGATGTCCCACC      | TTTCCATAAGCCTGAAAATGTCTCCTGG (WT) | <b>212</b> | -          |
|                                 | TCGAGCTCCCTCTGAGCA (Mutant)  | TTCTCTCAGGCAAGGGGAGGATA           | -          | <b>115</b> |
| <b>Reep5</b>                    | CAGATGTAGGAGCTGTGGCA         | AATGACTCCGCTTCAGCACT              | <b>533</b> | <b>526</b> |
| <b>Rtp4</b>                     | CTCCTTTATTTCAATCCCCACAC      | GATGGTTAGGGTCGCTTGTA              | <b>648</b> | <b>601</b> |

Mutant, specifically binds to the site of mutation in mutant alleles but not WT alleles; WT, specifically binds to the WT alleles but not to mutant alleles. Blue fonts represent the sequences downstream of deletion site in mutant alleles. Red fonts indicate the sequences that are only in the WT alleles because they were deleted in the mutant alleles.

Supplementary Table 7. List of primers used for RT-qPCR reactions

| Target gene                 | Forward primer           | Reverse primer           | bp  | Reference sequence |
|-----------------------------|--------------------------|--------------------------|-----|--------------------|
| <i>Actin</i>                | CATTGCTGACAGGATGCAGAAGG  | TGCTGGAAGGTGGACAGTGAGG   | 138 | NM_007393          |
| <i>Cd47</i>                 | GGCGCAAAGCACCGAAGAAATGTT | CCATGGCATCGCGCTTATCCATTT | 179 | NM_010581          |
| <i>Ciita</i>                | GATCAGTACGTGTTCCAGGATACC | AGTTCAGTGAGGTCCTAGAG     | 208 | NM_007575          |
| <i>Creb3</i>                | TGTTGCACCGCAAGCTTCGTG    | AAGATCCCAGAGTGGCCAGTG    | 206 | NM_013497          |
| <i>Gapdh</i>                | AGGTCGGTGTGAACGGATTTG    | GGGGTCGTTGATGGCAACA      | 95  | NM_008084          |
| <i>Hprt</i>                 | CTGGTGAAAAGGACCTCTCGAAG  | CCAGTTTCACTAATGACACAAACG | 146 | NM_013556          |
| <i>Ii2rg</i>                | AATTCCCCCATCAAGAATC      | GTAGTCTGGCTGCAGACTCTCA   | 109 | NM_001308535       |
| <i>Lepr</i>                 | ACTGTGCAGCTGAGGTATCAC    | GGCTGGACTGCTCCAATTACT    | 507 | NM_001122899       |
| <i>Lxra</i>                 | ATGCTACGCAAGGCTCTCTCC    | GCAAGTGTTTGCCCTTCGCC     | 203 | NM_013839          |
| <i>Lxrb</i>                 | ATCTGAGCCAGCAGCCAGCA     | TGACTTTGGGCTGGTCGGAGAA   | 188 | NM_009473          |
| <i>p16<sup>link4a</sup></i> | AAAGCGAACTCGAGGAGAGC     | TCATCATCACCTGAATCGGGG    | 169 | NM_001040654       |

|                                  |                         |                        |            |                  |
|----------------------------------|-------------------------|------------------------|------------|------------------|
| <b><i>p19<sup>Arf</sup></i></b>  | CGCTCTGGCTTTCGTGAACA    | TTGAGCAGAAGAGCTGCTACGT | <b>121</b> | <b>NM_009877</b> |
| <b><i>p27<sup>Kip1</sup></i></b> | GCGGTGCCTTTAATTGGGTCT   | GGCTTCTTGGGCGTCTGCT    | <b>230</b> | <b>NM_009875</b> |
| <b><i>p53</i></b>                | CCCCTGTCATCTTTTGTCCCT   | TTTCCTTCCACCCGGATAAG   | <b>326</b> | <b>NM_011640</b> |
| <b><i>Reep5</i></b>              | GAGATGTAGGCTGGGTATCCGAA | GGTTCCTGCACGAGAAGAACTG | <b>181</b> | <b>NM_007874</b> |
| <b><i>Rtp4</i></b>               | GGAAGATGTGCCCTTGCACAC   | GTGGCTCTATTTACGTTGGGG  | <b>196</b> | <b>NM_023386</b> |



# Supplementary Figure 1

**a**

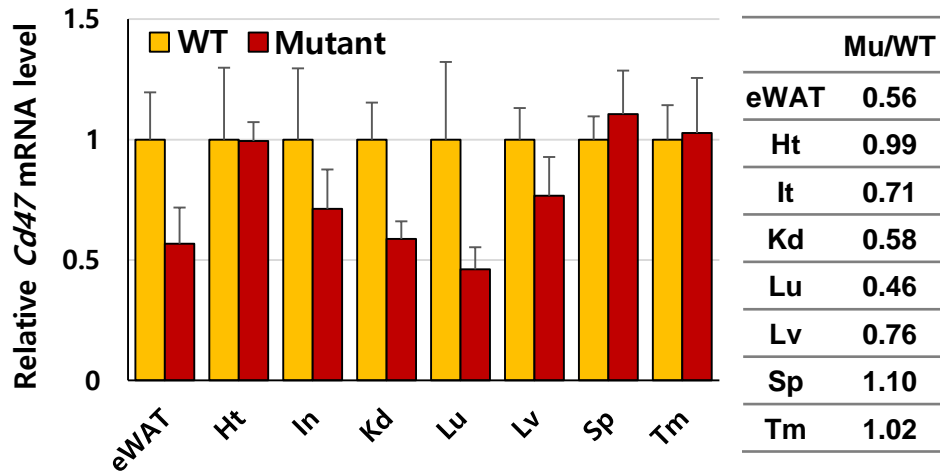

**b**

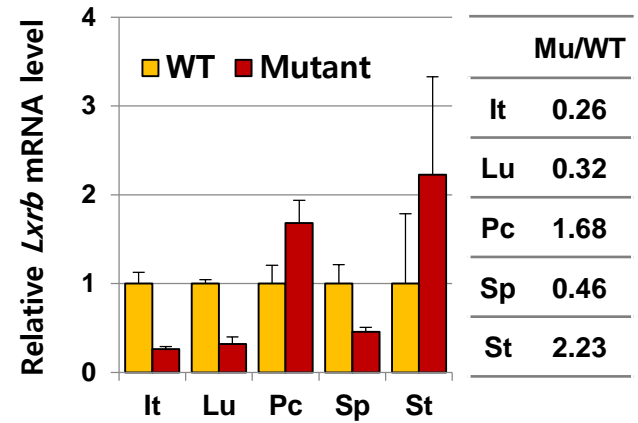

**c**

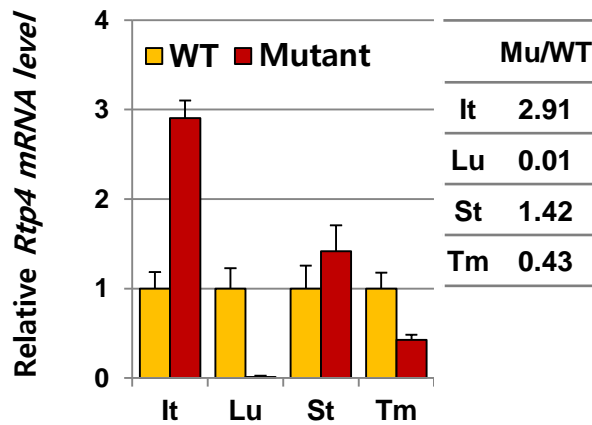

**d**

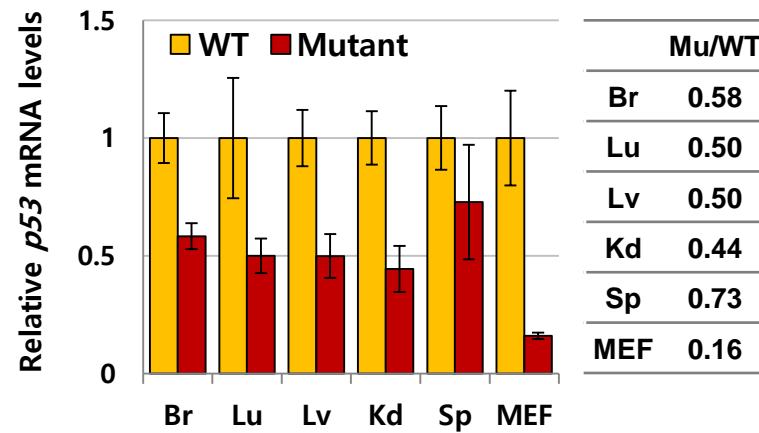

# Supplementary Figure 1 (continued)

**e**

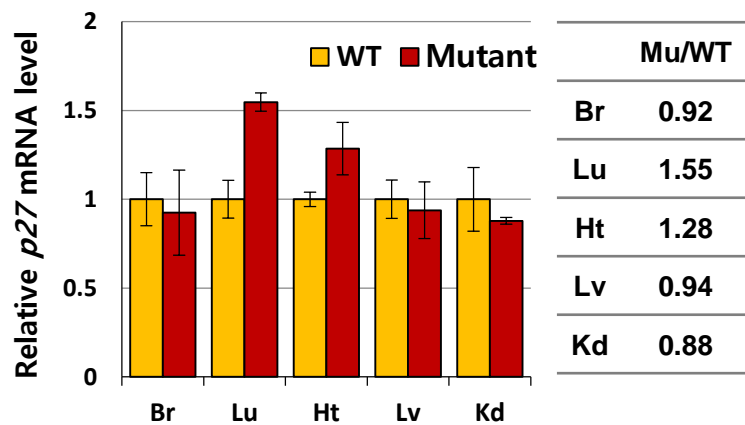

**f**

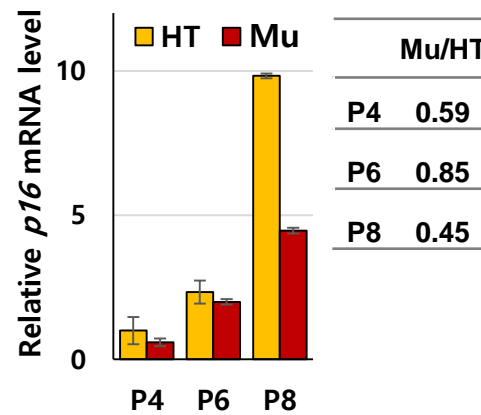

**g**

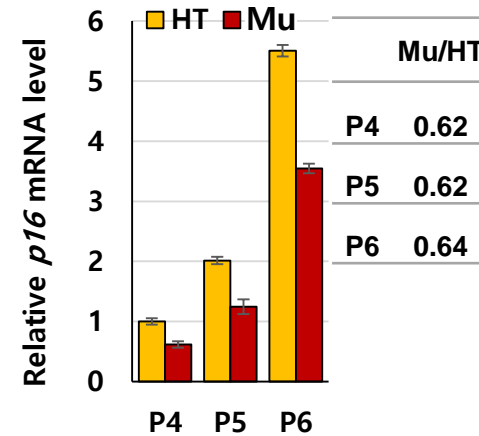

**h**

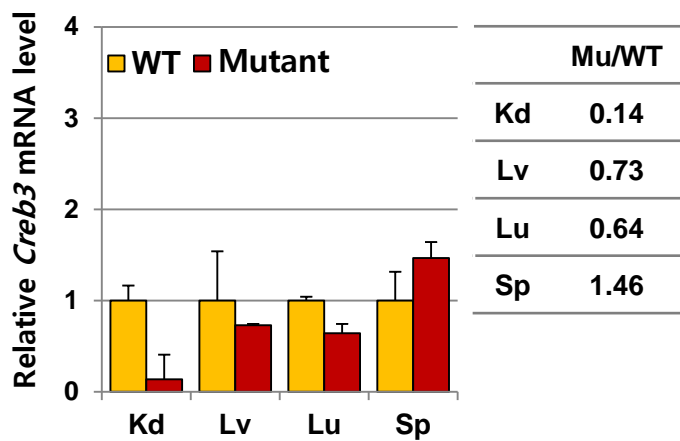

**i**

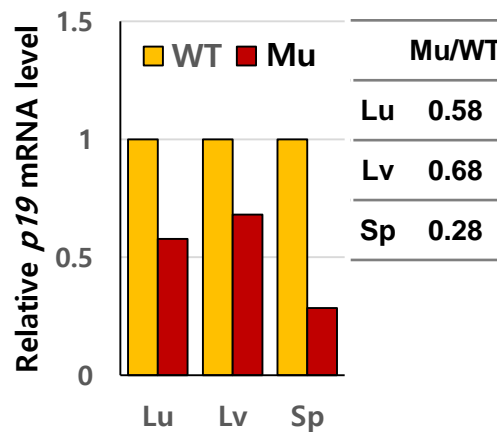

**j**

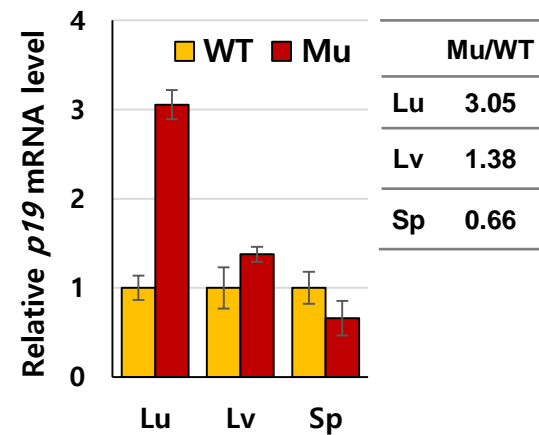

Supplementary Figure 1 (continued)

**k**

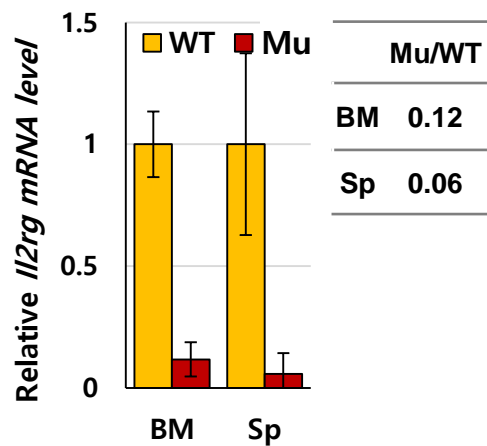

**l**

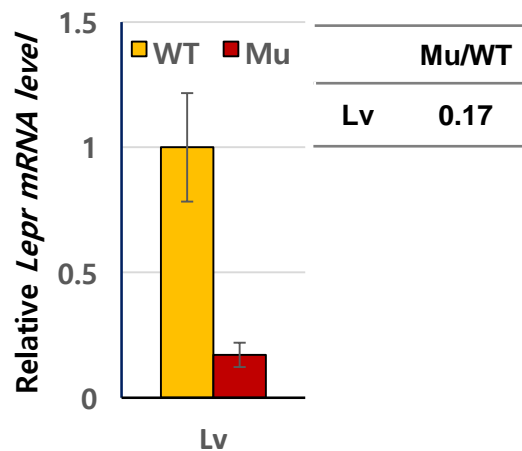

**m**

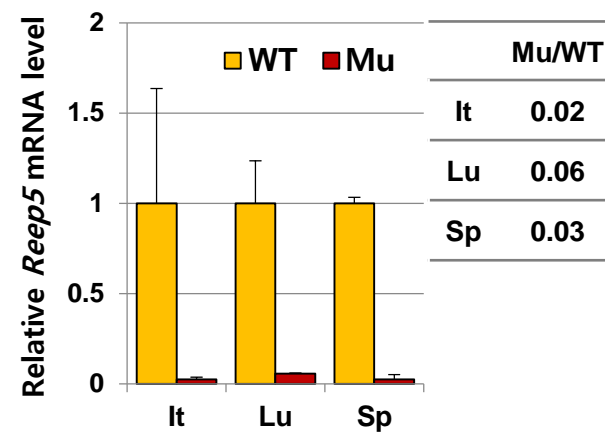

**n**

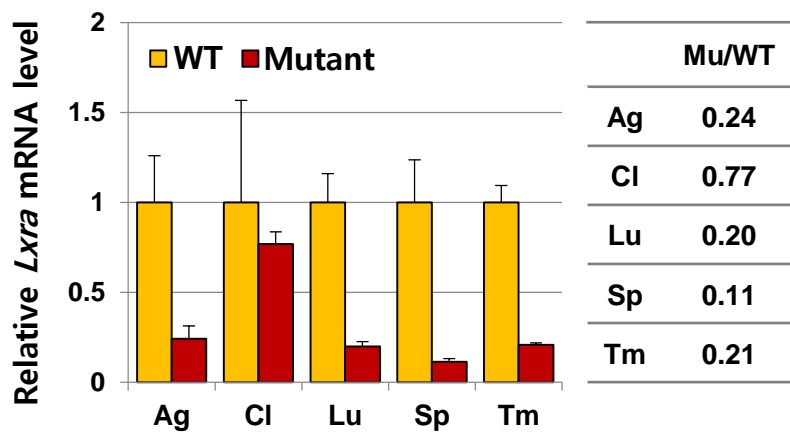

**o**

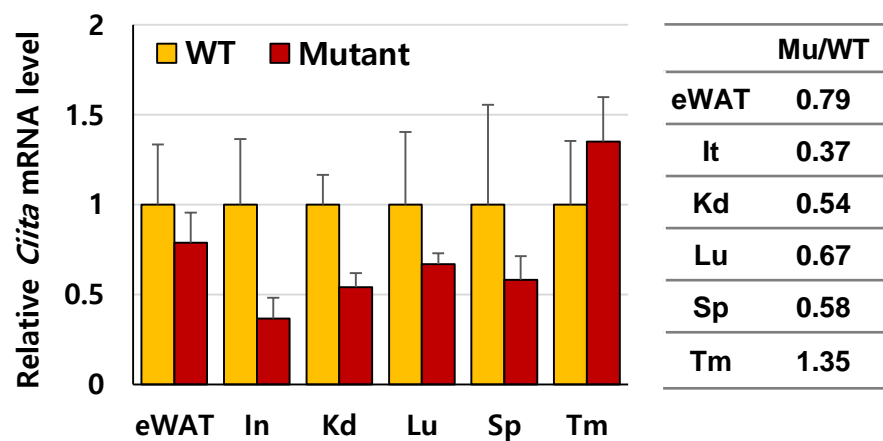

## Supplementary Figure 2

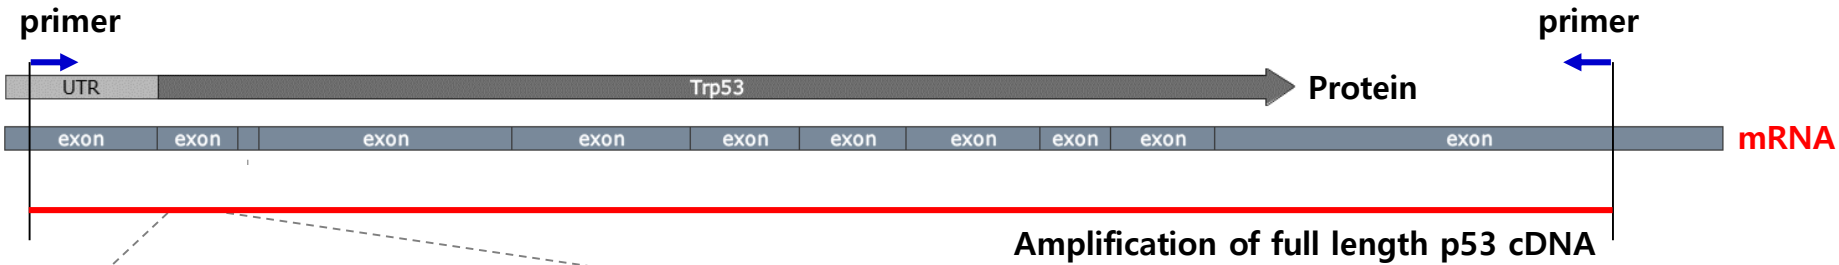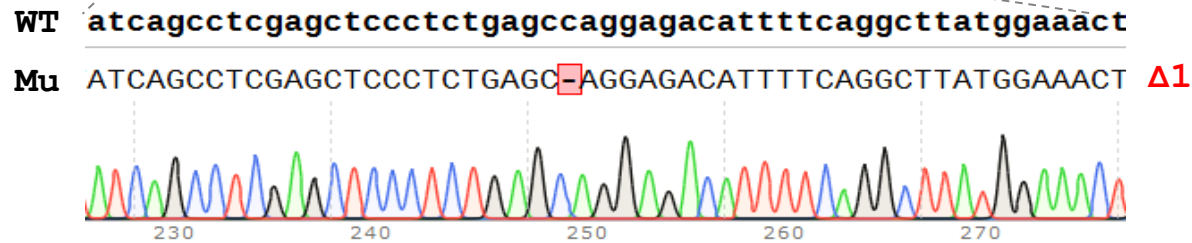

> Mutant p53 cDNA sequence (c.54\_54del1)

```

CATCCTGGCTGTAGGTAGCGACTACAGTTAGGGGGCACCTAGCATTTCAGGCCCTCATCCTCCTCCTTCCCAGCAGGGTGTACGCTTCTCC
GAAGACTGGATGACTGCCATGGAGGAGTCACAGTCGGATATCAGCCTCGAGCTCCCTCTGAGC -AGGAGACATTTTCAGGCTTATGGAAAC
TGCTTCCCTCCAGAAAGATATCCTGCCATCACCTCACTGCATGGACGATCTGTTGCTGCCCCAGGATGTTGAGGAGTTTTTTGAAGGCCCAAG
TGAAGCCCTCCGAGTGTGAGGAGCTCCTGCAGCACAGGACCCTGTCAACGAGACCCCTGGGCCAGTGGCCCTGCCCCAGCCACTCCATGG
CCCCTGTCATCTTTTGTCCCTTCTCAAAAACCTTACCAGGGCAACTATGGCTTCCACCTGGGCTTCCCTGCAGTCTGGGGCAGCCAAGTCTG
TTATGTGCACGTACTCTCCTCCCTCAATAAGCTATTCTGCCAGCTGGCGAAGACGTGCCCTGTGCAGTTGTGGGTGAGCGCCACACCTCC
AGCTGGGAGCCGTGTCCGCGCCATGGCCATCTACAAGAAGTCACAGCACATGAGCGGAGGTCGTGAGACGCTGCCCCACCATGAGCGCTGC
TCCGATGGTGTATGGCCTGGCTCCTCCCCAGCATCTTATCCGGGTGGAAGGAAATTTGTATCCCGAGTATCTGGAAGACAGGCAGACTTTTC
GCCACAGCGTGGTGGTACCTTATGAGCCACCCGAGGCCGGCTCTGAGTATAACCACCATCCACTACAAGTACATGTGTAATAGCTCCTGCAT
GGGGGGCATGAACCGCCGACCTATCCTTACCATCATCACACTGGAAGACTCCAGTGGGAACCTTCTGGGACGGGACAGCTTTGAGGTTTCGT
GTTTGTGCCTGCCCTGGGAGAGACCGCGTACAGAAGAAGAAAATTTCCGCAAAAAGGAAGTCCTTTGCCCTGAACTGCCCCAGGGAGCG
CAAAGAGAGCGCTGCCACCTGCACAAGCGCCTCTCCCCGCAAAAGAAAAAACCACTTGATGGAGAGTATTTACCCTCAAGATCCGCGG
GCGTAAACGCTTCGAGATGTTCCGGGAGCTGAATGAGGCCTTAGAGTTAAAGGATGCCCATGCTACAGAGGAGTCTGGAGACAGCAGGGCT
CACTCCAGCTACCTGAAGACCAAGAAGGGCCAGTCTACTTCCCGCCATAAAAAACAATGGTCAAGAAAGTGGGGCCTGACTCAGACTGAC
TGCTTCTGCATCCCGTCCCACATCACAGCCTCCCCCTCTCCTTGTGCTTATGACTTCAGGGCTGAGACACAATCCTCCCGGTCCCTTCT
GCTGCCTTTTTTACCTTGTAGCTAGGGCTCAGCCCCCTCTCTGAGTAGTGGTTCCCTGGCCCAAGTTGGGGAATAGGTTGATAGTTGTCAGG
TCTCTGCTGGCCAGCGAAATTCATCCAGCCAGTTGTTGGACCCTGGCACCTACAATGAAATCTCACCTACCCACACCCTGTAAGATT
CTATCTTGGGCCCTCATAGGGT
    
```

# Supplementary Figure 3

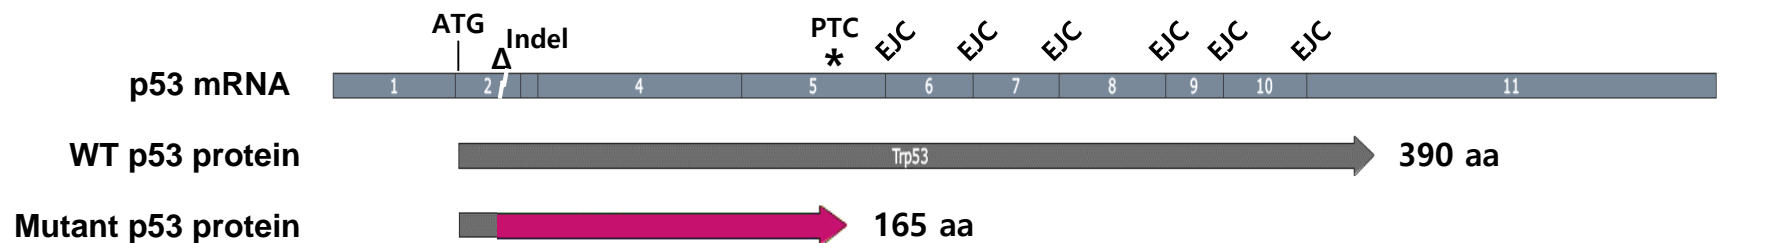

|    |     |            |            |             |             |             |             |     |
|----|-----|------------|------------|-------------|-------------|-------------|-------------|-----|
| WT | 1   | MTAMEESQSD | ISLELPLSQE | TFSGLWKLLP  | PEDILPSPHC  | MDDL LLPQDV | EEFFEGPSEA  | 60  |
| Mu | 1   | MTAMEESQSD | ISLELPLSRR | HFQAYGNYFL  | QKISCHHLTA  | WTICCCPRML  | RSFLKAQVKP  | 60  |
| WT | 61  | LRVSGAPAAQ | DPVTETPGPV | APAPATPWPL  | SSFVPSQKTY  | QGNYG FHLGF | LQSGTAKSVM  | 120 |
| Mu | 61  | SECQELLQHR | TLSRPLGQW  | PLPQPLHGPC  | HLLSLLK KLT | RATMASTWAS  | CSLGQPSLLC  | 120 |
| WT | 121 | CTYSPPLNKL | FCQLAKTCPV | QLWVSATPPA  | GSRVRAMAIY  | KKSQHMT EVV | RRCPHHERCS  | 180 |
| Mu | 121 | ARTLLPSISY | SASWRRRALC | SCGSAPHLQL  | GAVSAPWPST  | RSNST*      | 180         |     |
| WT | 181 | DGDGLAPPQH | LIRVEGNLYP | EYLED RQTFR | HSV VVPYEPP | EAGSEYTTIH  | YKYM CNSSCM | 240 |
| WT | 241 | GGMNRRPILT | IITLEDSSGN | LLGRDSFEVR  | VCACPGRDRR  | TEEENFRKKE  | VLCPELPPGS  | 300 |
| WT | 301 | AKRALPTCTS | ASPPQKKKPL | DGEYFTLKIR  | GRKRFEMFRE  | LNEALELKDA  | HATEESGDSR  | 360 |
| WT | 361 | AHSSYLKTKK | GQSTSRHKKT | MVKKVGPDS*  |             |             |             |     |

# Supplementary Figure 4

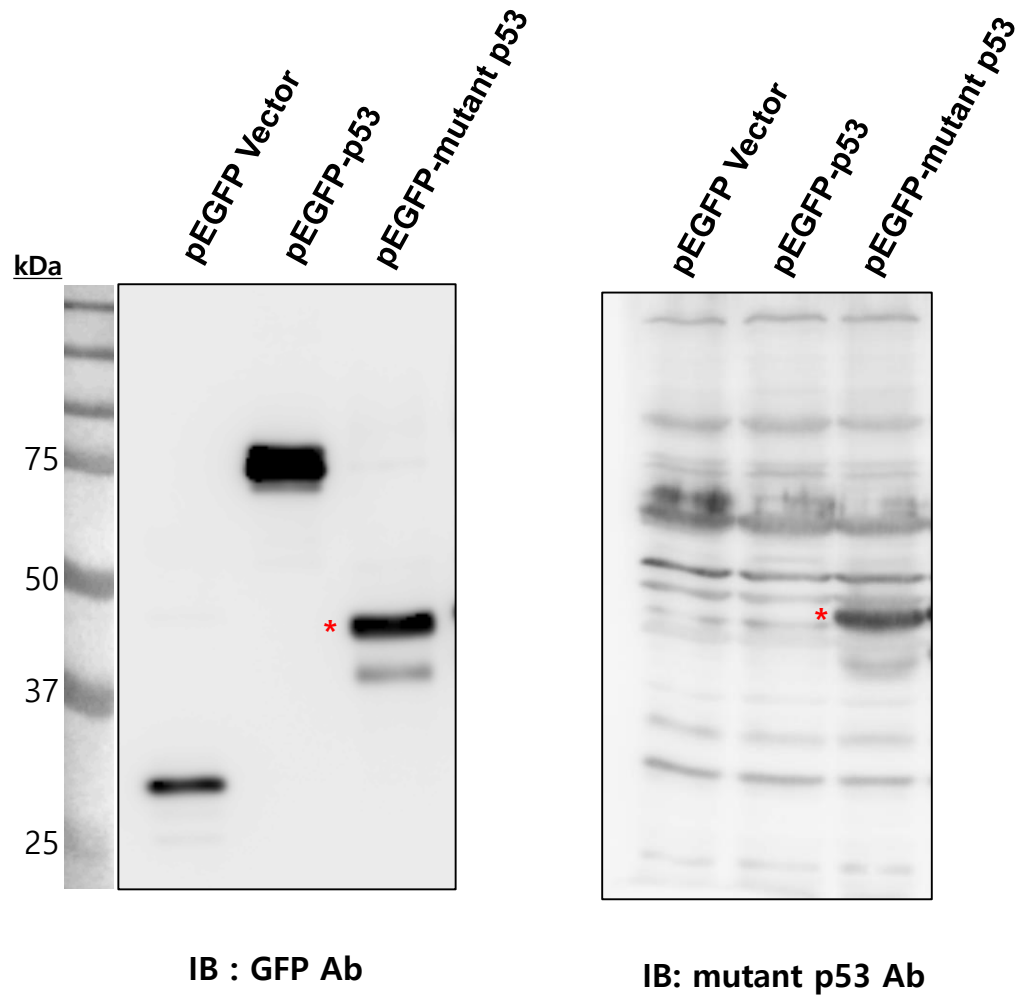

# Supplementary Figure 5

## Mascot Score Histogram

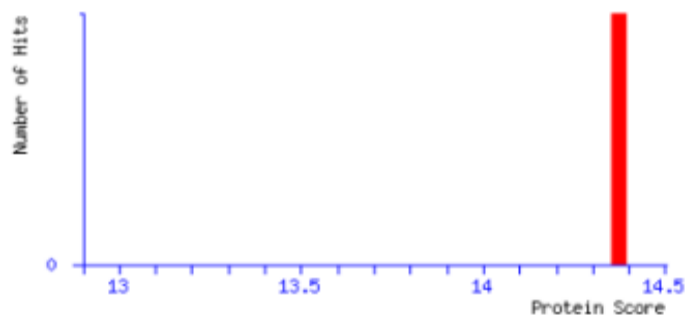

**Protein sequence coverage: 27%**

Matched peptides shown in **bold red**.

```

1  MTAMEESQSD ISLELPLSRR HPQAYGNYFL QKISCHHLTA WTICCCPRML
51 RSFLKAQVKP SECQELLQHR TLSPRPLGQW PLPQPLHGPC HLLSLLKKLT
101 RATMASTWAS CSLGQPSLLC ARTLLPSISY SASWRRRALC SCGSAPHLQL
151 GAVSAPWPST RSHST
    
```

| Query                                                    | Observed | Mr(expt)  | Mr(calc)  | Delta   | Miss | Score | Expect | Rank | Unique | Peptide                                             |
|----------------------------------------------------------|----------|-----------|-----------|---------|------|-------|--------|------|--------|-----------------------------------------------------|
| <input checked="" type="checkbox"/> <a href="#">550</a>  | 493.6483 | 1477.9230 | 1479.7722 | -1.8491 | 0    | 9     | 0.12   | 1    | U      | R.TLLPSISYSASWR.R                                   |
| <input checked="" type="checkbox"/> <a href="#">589</a>  | 758.8500 | 1515.6855 | 1517.6827 | -1.9972 | 0    | 1     | 0.76   | 1    | U      | R.HPQAYGNYPLQK.I                                    |
| <input checked="" type="checkbox"/> <a href="#">592</a>  | 758.8527 | 1515.6908 | 1517.6827 | -1.9919 | 0    | (1)   | 0.82   | 1    | U      | R.HPQAYGNYPLQK.I                                    |
| <input checked="" type="checkbox"/> <a href="#">1372</a> | 776.2241 | 2325.6504 | 2325.0828 | 0.5676  | 1    | (12)  | 0.069  | 1    | U      | -. <u>MTAMEESQSDISLELPLSRR</u> .H + 2 Oxidation (M) |
| <input checked="" type="checkbox"/> <a href="#">1373</a> | 776.2247 | 2325.6522 | 2325.0828 | 0.5694  | 1    | (5)   | 0.34   | 1    | U      | -. <u>MTAMEESQSDISLELPLSRR</u> .H + 2 Oxidation (M) |
| <input checked="" type="checkbox"/> <a href="#">1374</a> | 776.2260 | 2325.6562 | 2325.0828 | 0.5734  | 1    | (3)   | 0.49   | 1    | U      | -. <u>MTAMEESQSDISLELPLSRR</u> .H + 2 Oxidation (M) |
| <input checked="" type="checkbox"/> <a href="#">1375</a> | 776.2305 | 2325.6696 | 2325.0828 | 0.5868  | 1    | (8)   | 0.17   | 1    | U      | -. <u>MTAMEESQSDISLELPLSRR</u> .H + 2 Oxidation (M) |
| <input checked="" type="checkbox"/> <a href="#">1376</a> | 776.2354 | 2325.6844 | 2325.0828 | 0.6016  | 1    | 14    | 0.037  | 1    | U      | -. <u>MTAMEESQSDISLELPLSRR</u> .H + 2 Oxidation (M) |

# Supplementary Figure 6

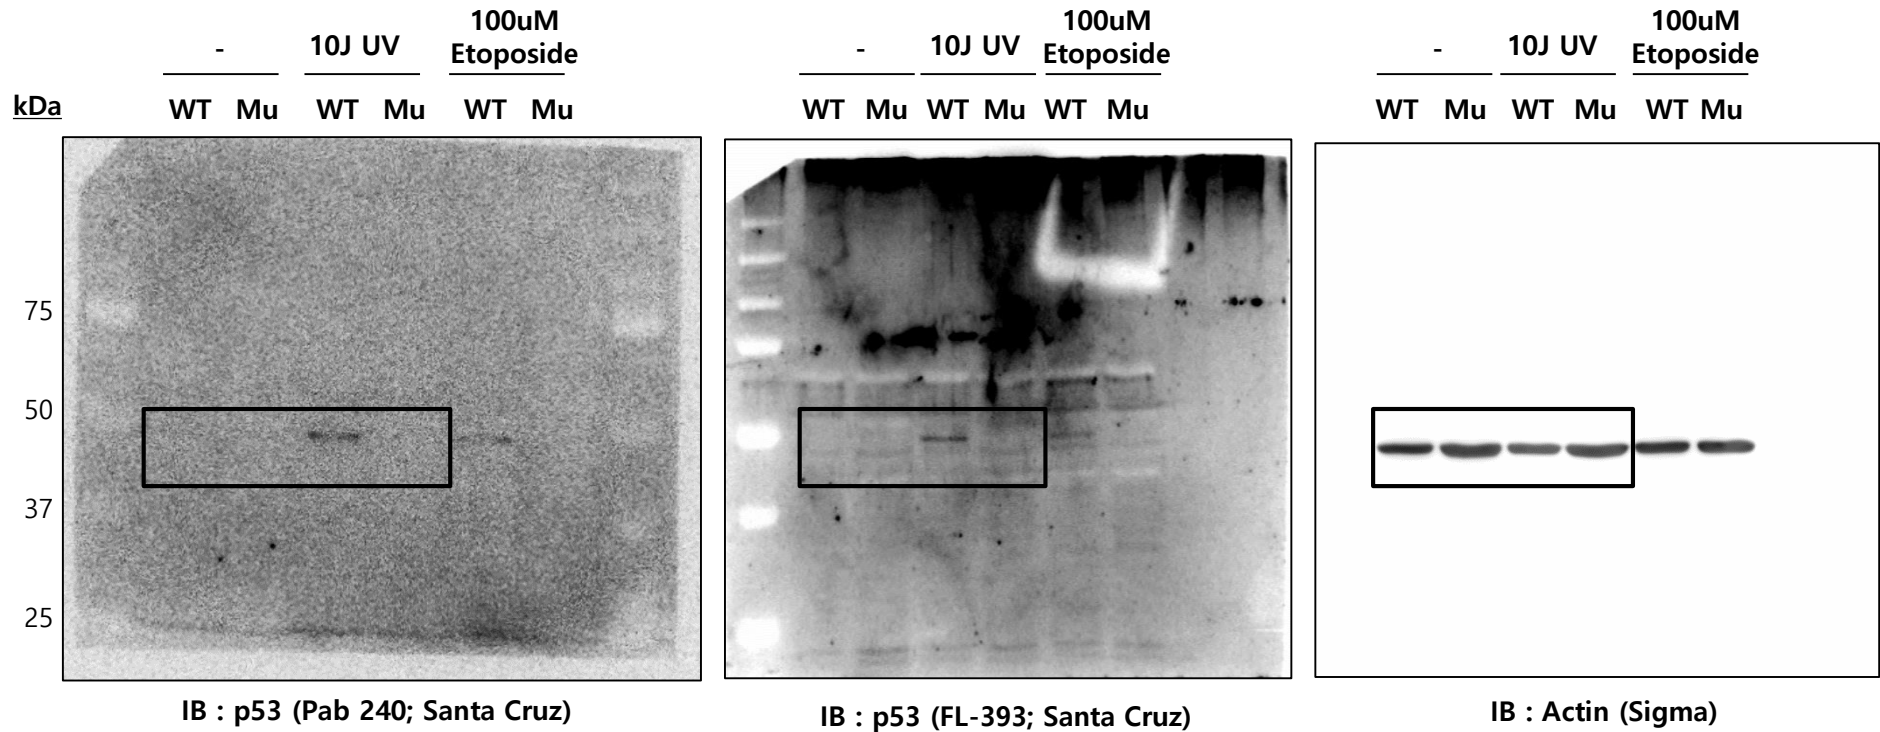



## Supplementary Figure Legends

**Supplementary Figure 1.** Abnormal mRNAs detected in mutant mice generated by engineered nuclease. The mRNA expression levels of each gene of interest were determined by RT-qPCR according to each tissue samples. The genes are listed as follows: *Cd47* (a), *Lxrb* (b), *Rtp4* (c), *p53* (d) in FVB/N mice; *p27<sup>Kip1</sup>* (e), *p16<sup>Ink4a</sup>* (f) in C57BL/6J strain; *p16<sup>Ink4a</sup>* (g) in FVB/N strain; *Creb3* (h), *p19<sup>Arf</sup>* (i) in C57BL/6J strain; *p19<sup>Arf</sup>* (j) in FVB/N strain; *Il2rg* (k), *Lepr* (l), *Reep5* (m), *Lxra* (n), and *Ciita* (o). Numerical values of normalized ratios between wild-type (WT) and mutant (Mu) are represented next to each bar graph. The experiments were performed in triplicates, and error bars indicate means  $\pm$  SD. P denotes the passage number in MEFs of *p16<sup>Ink4a</sup>* mutant mice. Ag, adrenal gland; BAT, brown adipose tissue; BM, bone marrow; Br, brain; Cl, colon; eWAT, epididymal white adipose tissue; Ht, heart; In, intestine; iWAT, inguinal white adipose tissue; Kd, kidney; Lu, lung; Lv, liver; MEF, mouse embryonic fibroblasts; Pc, Pancreas; Sp, spleen; St, Stomach; Tm, thymus.

**Supplementary Figure 2.** The sequence of full-length 1.5 kb *p53* cDNA cloned from the liver of *p53* mutant mice. The schematic diagram represents the p53 protein and mRNA structures. Red line denotes an amplified and cloned PCR product from the first strand of cDNA using the primers represented by blue arrows. The chromatogram shows the sequencing result for the enlarged region of *p53* sequence with deletion mutation. A dash (-) denotes a deleted nucleotide in the mutant *p53* cDNA sequence (c.54\_54del1). Red font and red box indicate the start codon and the premature termination codon, respectively. Mu, Mutant; WT, wild-type.

**Supplementary Figure 3.** The amino acid sequence of mutant *p53* which can be expressed in *p53* mutant mice. The schematic diagram represents the p53 mRNA and its mutant p53 protein sequence compared to WT p53 protein sequence. The red fonts and red box indicate the mutant p53 sequence and the epitope

region of mutant p53 antibody, respectively. Deletion mutations are noted as  $\Delta$  in the mRNA structure. ATG, translational initiation codon; PTC, premature termination codon; EJC, exon-junction complex; aa, amino acid. Mu, Mutant; WT, wild-type.

**Supplementary Figure 4.** Western blot analysis of mutant *p53* expression in 293T cells using the mutant p53 antibody we generated. The 293T cells were transfected with the indicated plasmids (pEGFP, pEGFP-p53, and pEGFP-mutant p53). The mutant p53 antibody specifically detected a mutant p53 protein but not WT p53 protein. Left panel shows a Western blot with GFP antibody to confirm the expression of EGFP-tagged p53 and mutant p53 proteins. Asterisks indicate the mutant p53 proteins.

**Supplementary Figure 5.** Mascot search result for MS/MS measurements of mutant p53 protein. *p53* mutant MEFs treated with 10 J/m<sup>2</sup> UV were immunoprecipitated using the mutant p53 antibody, and separated by SDS-PAGE on 10% gel. The gel was stained with Coomassie Blue R250. Major protein bands were excised from the gel and identified by MS/MS. The distribution of the Mascot score for MS/MS measurements of mutant p53 protein is shown as histograms. The peptides of mutant p53 protein found in the MS/MS analysis are indicated by red fonts above the full amino acid sequence of the mutant p53 protein. The box in the figure highlights the peptide sequence of the mutant p53 protein.

**Supplementary Figure 6.** Full-length blots of the experiments shown in Fig. 2b. Uncropped images are boxed in the regions shown in the main text. The etoposide results were excluded from the main text.

## Supplementary References

- 1 Sung, Y. H. *et al.* Knockout mice created by TALEN-mediated gene targeting. *Nat Biotechnol* **31**, 23-24, doi:10.1038/nbt.2477 (2013).
- 2 Fujii, W., Kawasaki, K., Sugiura, K. & Naito, K. Efficient generation of large-scale genome-modified mice using gRNA and CAS9 endonuclease. *Nucleic Acids Res* **41**, e187, doi:10.1093/nar/gkt772 (2013).
- 3 Noda, T. *et al.* Nine genes abundantly expressed in the epididymis are not essential for male fecundity in mice. *Andrology* **7**, 644-653, doi:10.1111/andr.12621 (2019).
- 4 Li, M. *et al.* CRISPR/Cas9 Promotes Functional Study of Testis Specific X-Linked Gene In Vivo. *PLoS One* **10**, e0143148, doi:10.1371/journal.pone.0143148 (2015).
- 5 Mashiko, D. *et al.* Generation of mutant mice by pronuclear injection of circular plasmid expressing Cas9 and single guided RNA. *Sci Rep* **3**, 3355, doi:10.1038/srep03355 (2013).
- 6 Liu, G., Wang, Y., Zheng, W., Cheng, H. & Zhou, R. P11 Loss-of-Function is Associated with Decreased Cell Proliferation and Neurobehavioral Disorders in Mice. *Int J Biol Sci* **15**, 1383-1395, doi:10.7150/ijbs.33773 (2019).
- 7 Young, S. A. *et al.* CRISPR/Cas9-Mediated Rapid Generation of Multiple Mouse Lines Identified Ccdc63 as Essential for Spermiogenesis. *Int J Mol Sci* **16**, 24732-24750, doi:10.3390/ijms161024732 (2015).
- 8 Liu, Y. *et al.* A modified TALEN-based strategy for rapidly and efficiently generating knockout mice for kidney development studies. *PLoS One* **9**, e84893, doi:10.1371/journal.pone.0084893 (2014).
- 9 Inui, M., Tamano, M., Kato, T. & Takada, S. CRISPR/Cas9-mediated simultaneous knockout of Dmrt1 and Dmrt3 does not recapitulate the 46,XY gonadal dysgenesis observed in 9p24.3 deletion patients. *Biochem Biophys Res* **9**, 238-244, doi:10.1016/j.bbrep.2017.01.001 (2017).
- 10 Nasser, S. *et al.* Generation of Fam83h knockout mice by CRISPR/Cas9-mediated gene engineering. *J Cell Biochem*, doi:10.1002/jcb.28381 (2019).
- 11 Shimamoto-Mitsuyama, C. *et al.* Evaluation of the role of fatty acid-binding protein 7 in controlling schizophrenia-relevant phenotypes using newly established knockout mice. *Schizophr Res*, doi:10.1016/j.schres.2019.02.002 (2019).
- 12 Wu, J. *et al.* Mlkl knockout mice demonstrate the indispensable role of Mlkl in necroptosis. *Cell Res* **23**, 994-1006, doi:10.1038/cr.2013.91 (2013).
- 13 Saegusa, S. *et al.* Mice lacking EFA6C/Psd2, a guanine nucleotide exchange factor for Arf6, exhibit lower Purkinje cell synaptic density but normal cerebellar motor functions. *PLoS One* **14**, e0216960, doi:10.1371/journal.pone.0216960 (2019).
- 14 Dannappel, M. *et al.* RIPK1 maintains epithelial homeostasis by inhibiting apoptosis and necroptosis. *Nature* **513**, 90-94, doi:10.1038/nature13608 (2014).

- 15 Ma, K. *et al.* Efficient targeting of FATS at a common fragile site in mice through TALEN-mediated double-hit genome modification. *Biotechnol Lett* **36**, 471-479, doi:10.1007/s10529-013-1387-z (2014).
- 16 Mizuno, S. *et al.* Simple generation of albino C57BL/6J mice with G291T mutation in the tyrosinase gene by the CRISPR/Cas9 system. *Mamm Genome* **25**, 327-334, doi:10.1007/s00335-014-9524-0 (2014).
- 17 Wang, H. *et al.* One-step generation of mice carrying mutations in multiple genes by CRISPR/Cas-mediated genome engineering. *Cell* **153**, 910-918, doi:10.1016/j.cell.2013.04.025 (2013).
- 18 Zuckermann, M. *et al.* Somatic CRISPR/Cas9-mediated tumour suppressor disruption enables versatile brain tumour modelling. *Nat Commun* **6**, 7391, doi:10.1038/ncomms8391 (2015).
- 19 Mandasari, M. *et al.* A facile one-step strategy for the generation of conditional knockout mice to explore the role of Notch1 in oroesophageal tumorigenesis. *Biochem Biophys Res Commun* **469**, 761-767, doi:10.1016/j.bbrc.2015.12.006 (2016).
- 20 Carbery, I. D. *et al.* Targeted genome modification in mice using zinc-finger nucleases. *Genetics* **186**, 451-459, doi:10.1534/genetics.110.117002 (2010).
- 21 Khan, M. *et al.* The evolutionarily conserved genes: Tex37, Ccdc73, Prss55 and Nxt2 are dispensable for fertility in mice. *Sci Rep* **8**, 4975, doi:10.1038/s41598-018-23176-x (2018).
- 22 Liu, Y. M. *et al.* Abnormalities of hair structure and skin histology derived from CRISPR/Cas9-based knockout of phospholipase C-delta 1 in mice. *J Transl Med* **16**, 141, doi:10.1186/s12967-018-1512-9 (2018).
